# Supplementary material for: LKB1 Differently Regulates Adipogenesis in Intramuscular and Subcutaneous Adipocytes through Metabolic and Cytokine-Related Signaling Pathways
Source: PubMed Central journal article supplement (PMC7761942; doi:10.3390/cells9122599), 2020-12-04
Supplement: cells-09-02599-s001.pdf [file cells-09-02599-s001.pdf]

# LKB1 differently regulates adipogenesis in intramuscular and subcutaneous adipocytes through metabolic and cytokine-related signaling pathways

## Supplementary materials

### Supplementary Figure 1

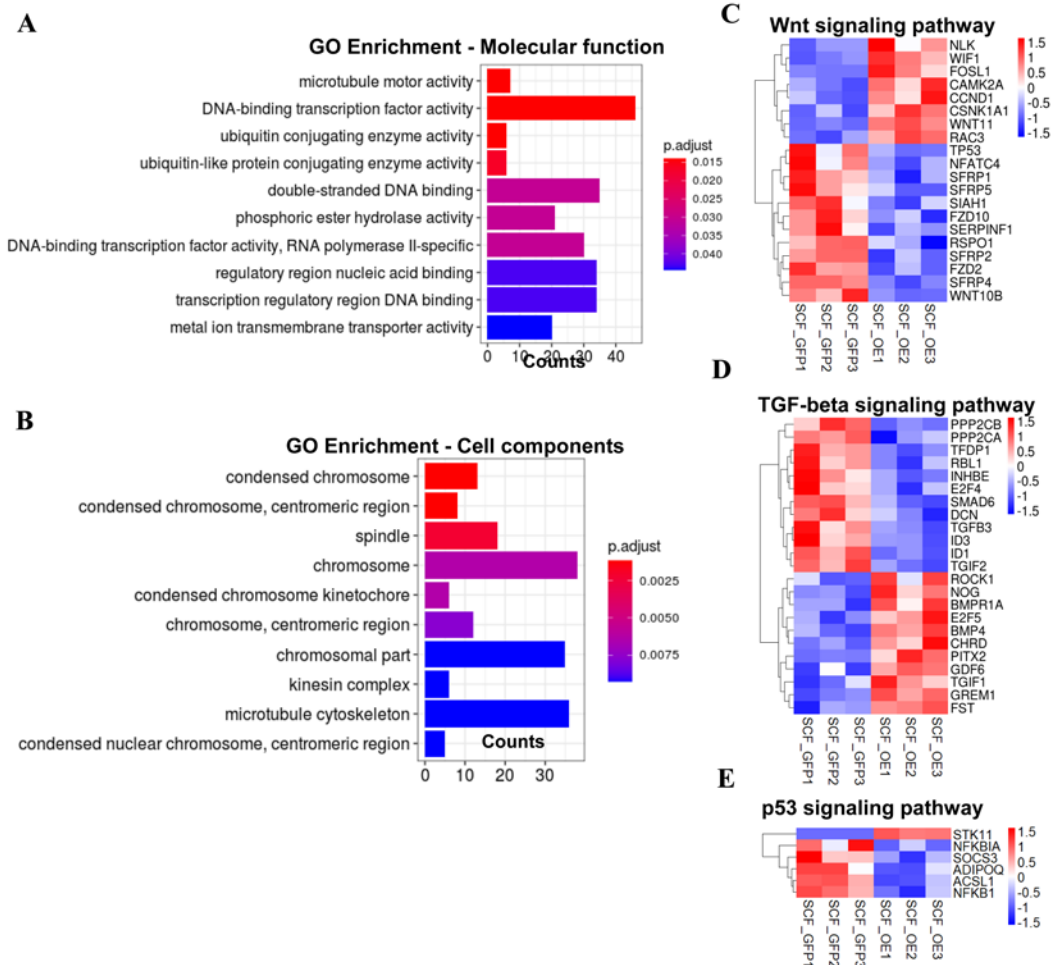

**Supplementary Figure 1. LKB1 overexpression alters the transcriptional profile of SCF adipocytes (A, B) Gene Ontology (GO) enrichment analysis based on molecular function (A) and cell components (B) and enriched terms were visualized by bar plot. The bar color indicates significances and the corresponding significance values are displayed as P.adjust. The bar length indicates significantly changed gene counts of genes involved in certain categories. (C-E) Heatmap of TPM expression values genes involved in the Wnt signaling pathway (C), TGF-beta signaling pathway (D) and p53 signaling pathway (E). Only genes with  $P < 0.05$  are displayed.**

**Supplementary Figure 2**

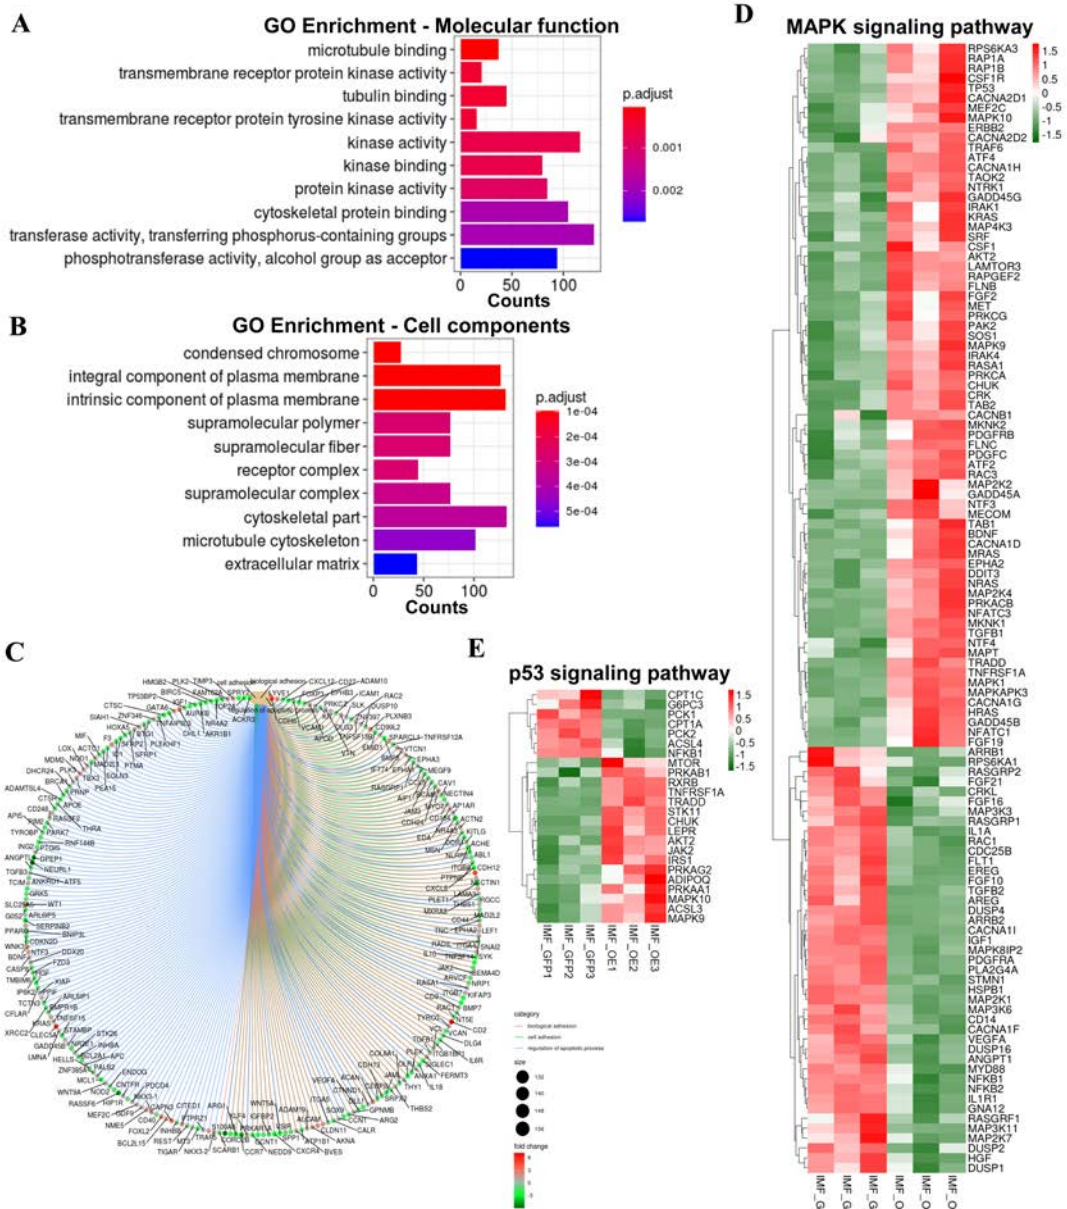

**Supplementary Figure 2. LKB1 overexpression alters the transcriptional profile of IMF adipocytes. (A, B)** Gene Ontology (GO) enrichment analysis based on molecular function (A) and cell components (B) and enriched terms were visualized by bar plot. The bar color indicates significance, and the corresponding significance values are displayed as P.adjust. The bar length indicates significantly changed gene counts of genes involved in certain categories. (C) The cnetplot depicted the linkages of the three most enriched GO terms (cell adhesion, biological adhesion, regulation of apoptotic process) and genes involved in these terms as a network. The yellow dots indicate enriched GO terms and the size of each dots indicates gene counts involved in certain GO terms. These smaller dots indicate genes involved in these terms. The color of each smaller dot indicates log<sub>2</sub>(fold change) values genes in LKB1-overexpressing IMF adipocytes versus controls. (D, E) Heatmap of TPM expression values genes involved

in the MAPK signaling pathway (D) and p53 signaling pathway (E). Only genes with  $P < 0.05$  are displayed.

**Supplementary Figure 3**

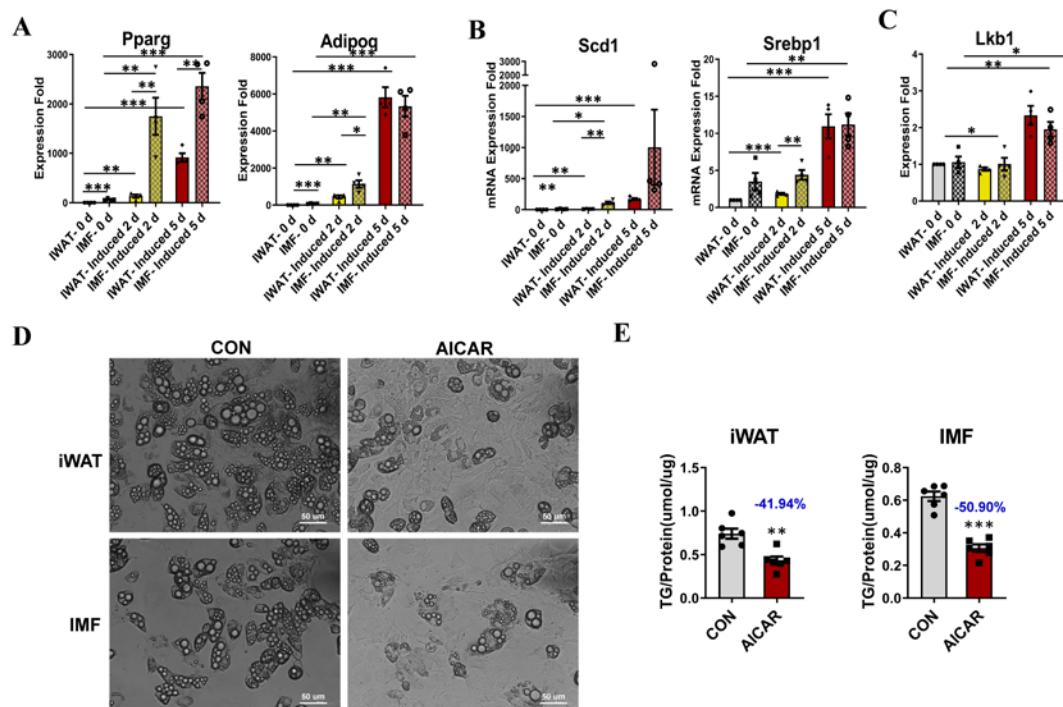

**Supplementary Figure 3.** Expression levels of adipogenesis-related genes in mouse IMF and iWAT adipocytes during adipogenic differentiation. (A-C) q-PCR results of the mRNA levels of *Pparg*, *Adipoq* (A), *Scd1*, *Srebp1* (B), *Lkb1* (C) in iWAT and IMF adipocytes before and after adipogenic differentiation induction (n = 4). (D) Optical microscope images of differentiated iWAT and IMF adipocytes exposed to AICAR (1MM) or control. (E) TG contents of differentiated iWAT and IMF adipocytes exposed to AICAR (1MM) or control. Data is presented as the means  $\pm$  SEM. \*  $P < 0.05$ , \*\*\*  $P < 0.001$ .

**Supplementary Table 1.** Primers used for qPCR.

| Gene             | Primer Name | Primer Sequence (5'-3') |
|------------------|-------------|-------------------------|
| m- <i>Lkb1</i>   | Forward     | TTGGGCCTTTTCTCCGAGG     |
|                  | Reversed    | CAGGTCCCCCATCAGGTACT    |
| m-Cebpa          | Forward     | TTACAACAGGCCAGGTTTCC    |
|                  | Reversed    | GGCTGGCGACATACAGTACA    |
| m- <i>Adipoq</i> | Forward     | TGTTCTCTTAATCCTGCCCCA   |
|                  | Reversed    | CCAACCTGCACAAGTTCCTT    |
| m- <i>Scd1</i>   | Forward     | CGCTGGCACATCAACTTCAC    |
|                  | Reversed    | AGGAACTCAGAAGCCCAAAGC   |
| m- <i>Srebp1</i> | Forward     | GGAGCCATGGATTGCACATT    |
|                  | Reversed    | GGCCCGGGAAGTCACTGT      |
| m- <i>Pparg</i>  | Forward     | TCGCTGATGCACTGCCTATG    |
|                  | Reversed    | GAGAGGTCCACAGAGCTGATT   |

|          |          |                             |
|----------|----------|-----------------------------|
| m-Cpt1a  | Forward  | TGTCCAAGTATCTGGCAGTCG       |
|          | Reversed | CATAGCCGTCATCAGCAACC        |
| m-Il1b   | Forward  | GCAACTGTTCTGAACCTCAACT      |
|          | Reversed | ATCTTTTGGGGTCCGTCAACT       |
| m-Ccl7   | Forward  | GCTGCTTTCAGCATCCAAGTG       |
|          | Reversed | CCAGGGACACCGACTACTG         |
| m-Ucp1   | Forward  | AGGCTTCCAGTACCATTAGGT       |
|          | Reversed | CTGAGTGAGGCAAAGCTGATTT      |
| m-Pgc1a  | Forward  | TATGGAGTGACATAGAGTGTGT      |
|          | Reversed | CCACTTCAATCCACCCAGAAAG      |
| m-Prdm16 | Forward  | CCACCAGCGAGGACTTCAC         |
|          | Reversed | GGAGGACTCTCGTAGCTCGAA       |
| m-Cox5a  | Forward  | TTGATGCCTGGGAATTGCGTAAAG    |
|          | Reversed | AACAACCTCCAAGATGCGAACAG     |
| m-Cox7a  | Forward  | GCTCTGGTCCGGTCTTTTAGC       |
|          | Reversed | GTACTGGGAGGTCATTGTCCG       |
| m-18s    | Forward  | AGTCCCTGCCCTTTGTACACA       |
|          | Reversed | CGATCCGAGGGCCTCACTA         |
| p-Pparg  | Forward  | TGTGGACCTGTCGGTGATG         |
|          | Reversed | TGGAGTGGAATGCTGGAGA         |
| p-Cebpa  | Forward  | CGGTGCGTCTAAGATGAGG         |
|          | Reversed | AGCGGTGAGTTTGCSTT           |
| p-Adipoq | Forward  | CTGGCGAGAAGAGTGAGA          |
|          | Reversed | TGCTGAACGGTAGACATAGGC       |
| p-Fabp4  | Forward  | GGAAGGTGGCTGGCATGGC         |
|          | Reversed | CCTCCATCTAAGGTTATGGTGCTCTTG |
| p-Leptin | Forward  | AGATCCTCACCAGTCTGCCTTCC     |
|          | Reversed | CCAGGCTCTCCAAGGTCTCCAG      |
| p-Lkb1   | Forward  | TTTACAGAGGGCGAGCTGAT        |
|          | Reversed | CATCAGGTACTTGCCGATGA        |
| p-Hsl    | Forward  | ACCCTCGGCTGTCAACTTCTT       |
|          | Reversed | ACTTTCTCCTCCTTGGTGCTAATCT   |
| p-Atgl   | Forward  | GCACATCTCTCGAAGCACCA        |
|          | Reversed | GCACATCTCTCGAAGCACCA        |
| p-Glut4  | Forward  | GAAGGAAGAAGGCAATGCTG        |
|          | Reversed | GAGGAACCGTCCAAGAATGA        |
| p-18s    | Forward  | CCCACGGAATCGAGAAAGAG        |
|          | Reversed | TTGACGGAAGGGCACCA           |
